# Supplementary material for: Addressing Barriers to Reducing Prescribing and Implementing Deprescribing of Sedative-Hypnotics in Primary Care
Source: PubMed Central journal article supplement — Ann Pharmacother. 2021 Jul 23;56(4):463–74. doi: 10.1177/10600280211033022 (PMC8899816; doi:10.1177/10600280211033022), 2021-07-23
Supplement: sj-pdf-1-aop-10.1177_10600280211033022.pdf [file sj-pdf-1-aop-10.1177_10600280211033022.pdf]

## Medline

Database(s): Ovid MEDLINE(R) and Epub Ahead of Print, In-Process, In-Data-Review & Other Non-Indexed Citations and Daily 1946 to June 15, 2021

Search Strategy:

| #  | Searches                                                                                                                                                                                                                                                                                                                                                                                                                                                                                                                                                                   | Results |
|----|----------------------------------------------------------------------------------------------------------------------------------------------------------------------------------------------------------------------------------------------------------------------------------------------------------------------------------------------------------------------------------------------------------------------------------------------------------------------------------------------------------------------------------------------------------------------------|---------|
| 1  | exp Sleep Medicine Specialty/ or exp "Sleep Initiation and Maintenance Disorders"/dt, th, pc                                                                                                                                                                                                                                                                                                                                                                                                                                                                               | 6932    |
| 2  | exp sleep wake disorders/dt, th, pc                                                                                                                                                                                                                                                                                                                                                                                                                                                                                                                                        | 27882   |
| 3  | exp *Sleep Medicine Specialty/ or exp *"Sleep Initiation and Maintenance Disorders"/dt, th, pc or exp *sleep wake disorders/dt, th, pc or sleep*.ti,ab,kw. or insomnia*.ti,ab,kw.                                                                                                                                                                                                                                                                                                                                                                                          | 210283  |
| 4  | exp hospital units/ or inpatient*.mp. or ("in" adj patient*).mp. or *hospitalization/                                                                                                                                                                                                                                                                                                                                                                                                                                                                                      | 2065753 |
| 5  | critical care/ or early goal-directed therapy/                                                                                                                                                                                                                                                                                                                                                                                                                                                                                                                             | 55129   |
| 6  | (icu or icus or ccu or ccus or (critical* adj ill*) or ventilat* or intubat* or "intensive care" or "critical care").mp.                                                                                                                                                                                                                                                                                                                                                                                                                                                   | 493147  |
| 7  | exp Respiratory Insufficiency/ or Respiratory Distress Syndrome, Adult/ or ards.mp.                                                                                                                                                                                                                                                                                                                                                                                                                                                                                        | 90903   |
| 8  | SEPSIS/ or Shock, Septic/ or sepsis.mp.                                                                                                                                                                                                                                                                                                                                                                                                                                                                                                                                    | 148307  |
| 9  | or/1-3                                                                                                                                                                                                                                                                                                                                                                                                                                                                                                                                                                     | 212744  |
| 10 | or/4-8                                                                                                                                                                                                                                                                                                                                                                                                                                                                                                                                                                     | 2554603 |
| 11 | 9 and 10                                                                                                                                                                                                                                                                                                                                                                                                                                                                                                                                                                   | 38872   |
| 12 | (sleep adj3 (duration or fragment* or hygiene or environment* or intens* or disrupt* or interrupt* or efficien*).mp.                                                                                                                                                                                                                                                                                                                                                                                                                                                       | 23383   |
| 13 | 10 and 12                                                                                                                                                                                                                                                                                                                                                                                                                                                                                                                                                                  | 3736    |
| 14 | "Hypnotics and Sedatives"/ or sedative*.mp. or sedation*.mp.                                                                                                                                                                                                                                                                                                                                                                                                                                                                                                               | 76513   |
| 15 | 11 and 14                                                                                                                                                                                                                                                                                                                                                                                                                                                                                                                                                                  | 1606    |
| 16 | 14 and 10                                                                                                                                                                                                                                                                                                                                                                                                                                                                                                                                                                  | 20619   |
| 17 | 16 and (4 or sleep*.mp. or insomni*.mp. or 12)                                                                                                                                                                                                                                                                                                                                                                                                                                                                                                                             | 12528   |
| 18 | 13 or 15 or 17                                                                                                                                                                                                                                                                                                                                                                                                                                                                                                                                                             | 15976   |
| 19 | limit 18 to (clinical trial, all or clinical trial, phase i or clinical trial, phase ii or clinical trial, phase iii or clinical trial, phase iv or clinical trial or comparative study or controlled clinical trial or evaluation studies or meta analysis or multicenter study or observational study or pragmatic clinical trial or randomized controlled trial or systematic reviews) [Limit not valid in Ovid MEDLINE(R),Ovid MEDLINE(R) Daily Update,Ovid MEDLINE(R) PubMed not MEDLINE,Ovid MEDLINE(R) In-Process,Ovid MEDLINE(R) Publisher; records were retained] | 5285    |
| 20 | limit 19 to "all adult (19 plus years)"                                                                                                                                                                                                                                                                                                                                                                                                                                                                                                                                    | 4077    |
| 21 | 18 and (adult* or men or women or older or elder* or geriatric*).ti,ab,hw,kw.                                                                                                                                                                                                                                                                                                                                                                                                                                                                                              | 7988    |
| 22 | 21 and (trial* or control* or compar* or intervention*).mp.                                                                                                                                                                                                                                                                                                                                                                                                                                                                                                                | 5917    |
| 23 | 20 or 22                                                                                                                                                                                                                                                                                                                                                                                                                                                                                                                                                                   | 6992    |
| 24 | limit 23 to (english language and yr="2003 - current")                                                                                                                                                                                                                                                                                                                                                                                                                                                                                                                     | 5037    |
| 25 | remove duplicates from 24                                                                                                                                                                                                                                                                                                                                                                                                                                                                                                                                                  | 5033    |

## Embase

Database(s): Embase 1988 to 2021 Week 23

Search Strategy:

| #  | Searches                                                                                                                                                                          | Results |
|----|-----------------------------------------------------------------------------------------------------------------------------------------------------------------------------------|---------|
| 1  | exp Sleep Medicine Specialty/ or exp "Sleep Initiation and Maintenance Disorders"/dt, th, pc                                                                                      | 14775   |
| 2  | exp sleep wake disorders/dt, th, pc                                                                                                                                               | 27265   |
| 3  | exp *Sleep Medicine Specialty/ or exp *"Sleep Initiation and Maintenance Disorders"/dt, th, pc or exp *sleep wake disorders/dt, th, pc or sleep*.ti,ab,kw. or insomnia*.ti,ab,kw. | 298128  |
| 4  | exp hospital units/                                                                                                                                                               | 560994  |
| 5  | critical care/ or early goal-directed therapy/                                                                                                                                    | 97339   |
| 6  | (icu or icus or ccus or ccus or (critical* adj ill*) or ventilat* or intubat* or "intensive care" or "critical care").mp.                                                         | 746841  |
| 7  | exp Respiratory Insufficiency/ or Respiratory Distress Syndrome, Adult/ or ards.mp.                                                                                               | 132290  |
| 8  | SEPSIS/ or Shock, Septic/ or sepsis.mp.                                                                                                                                           | 231067  |
| 9  | or/1-3                                                                                                                                                                            | 304557  |
| 10 | or/4-8                                                                                                                                                                            | 1294754 |
| 11 | 9 and 10                                                                                                                                                                          | 21111   |
| 12 | (sleep adj3 (duration or fragment* or hygiene or environment* or intens* or disrupt* or interrupt* or efficien*)).mp.                                                             | 38418   |
| 13 | 10 and 12                                                                                                                                                                         | 2000    |
| 14 | *sleep disorder/ or exp *daytime somnolence/ or exp *insomnia/ or exp *parasomnia/ or exp *somnolence/                                                                            | 41748   |
| 15 | *sleep disorder/dt, th, pc or exp *daytime somnolence/dt, th, pc or exp *insomnia/dt, th, pc or exp *parasomnia/dt, th, pc or exp *somnolence/dt, th, pc                          | 9906    |
| 16 | exp hypnotic sedative agent/                                                                                                                                                      | 318275  |
| 17 | 15 and 16                                                                                                                                                                         | 4731    |
| 18 | 17 and 10                                                                                                                                                                         | 113     |
| 19 | critically ill patient/                                                                                                                                                           | 51675   |
| 20 | 17 and 19                                                                                                                                                                         | 11      |
| 21 | (10 or 19) and 16                                                                                                                                                                 | 41228   |
| 22 | 21 and (14 or 12)                                                                                                                                                                 | 361     |
| 23 | 18 or 20 or 22                                                                                                                                                                    | 361     |
| 24 | limit 23 to (adult <18 to 64 years> or aged <65+ years>)                                                                                                                          | 150     |
| 25 | 11 and 16                                                                                                                                                                         | 1815    |
| 26 | exp case control study/ or exp case study/ or exp clinical trial/ or exp intervention study/ or exp major clinical study/ or exp prospective study/ or exp retrospective study/   | 5581242 |
| 27 | comparative study/                                                                                                                                                                | 796371  |
| 28 | 25 and (26 or 27)                                                                                                                                                                 | 559     |
| 29 | limit 28 to (adult <18 to 64 years> or aged <65+ years>)                                                                                                                          | 359     |
| 30 | 24 or 29                                                                                                                                                                          | 422     |
| 31 | limit 30 to (english language and yr="2003 - current")                                                                                                                            | 383     |
| 32 | 31 not (case report/ or conference abstract.pt.)                                                                                                                                  | 253     |
| 33 | remove duplicates from 32                                                                                                                                                         | 253     |
